# Supplementary material
Source: PubMed Central journal article supplement (PMC7169808)
Supplement: TAX-60-1429-s001.pdf [file TAX-60-1429-s001.pdf]

# TAXON

International Journal of Taxonomy, Phylogeny and Evolution

Electronic Supplement to

**Molecular delimitation of clades within  
New World species of the “spiny solanums”  
(*Solanum* subg. *Leptostemonum*)**

Stephen Stern, Maria de Fátima Agra & Lynn Bohs

*Taxon* 60: 1429–1441

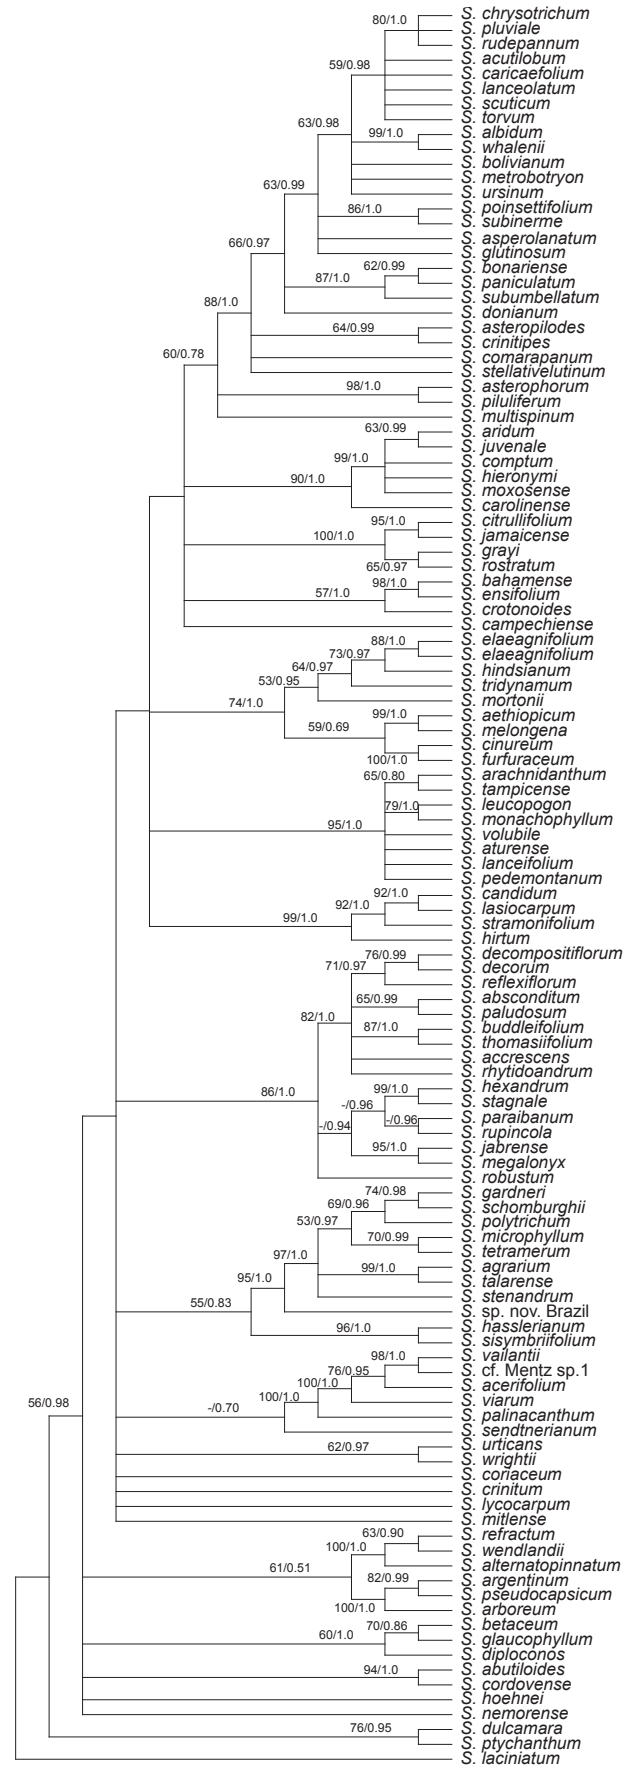

**Fig. S1.** Strict consensus of 385,577 most parsimonious trees obtained from the *trnT-F* data. Numbers above branches are bootstrap values over 50% followed by posterior probabilities from Bayesian analysis.

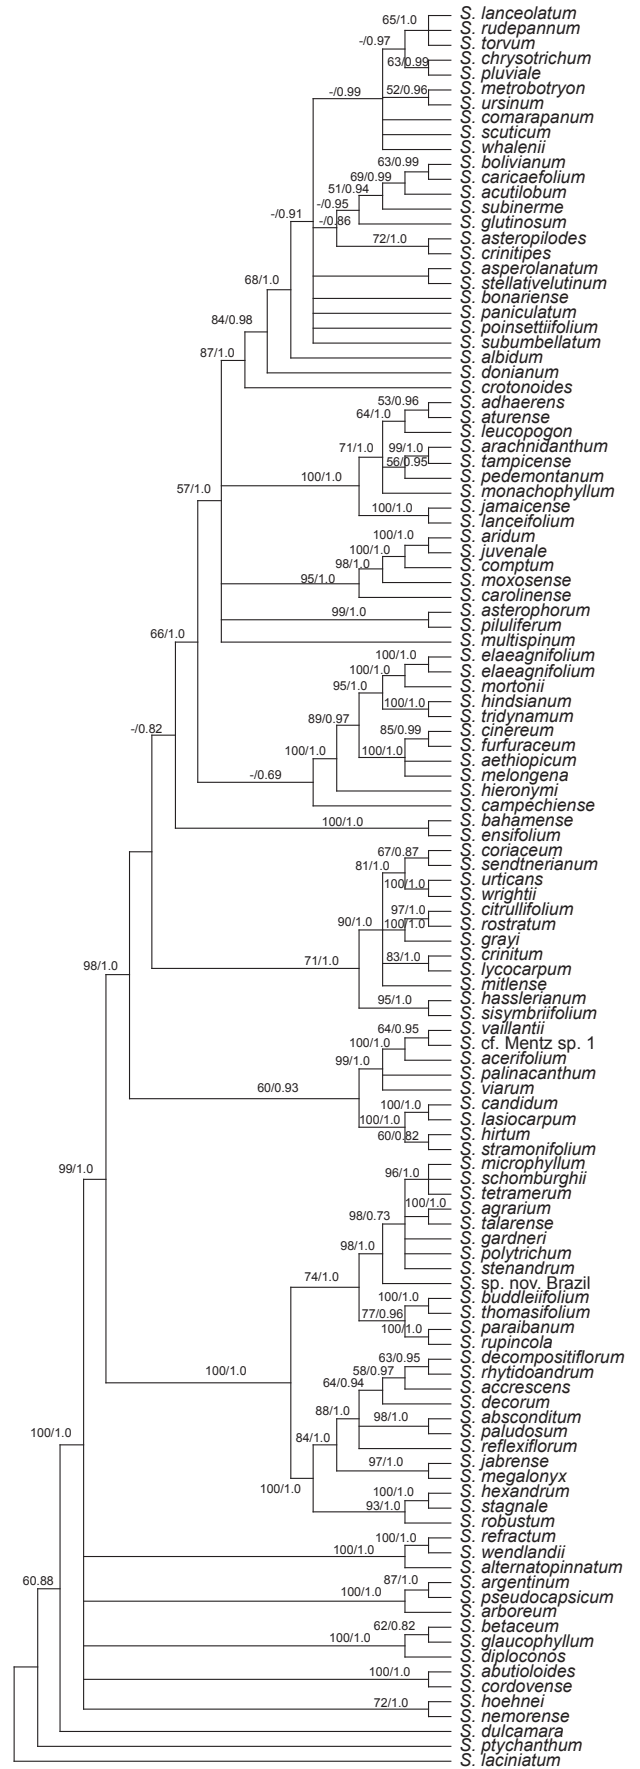

**Fig. S2.** Strict consensus of 19,579 most parsimonious trees obtained from the *waxy* data. Numbers above branches are bootstrap values over 50% followed by posterior probabilities from Bayesian analysis.

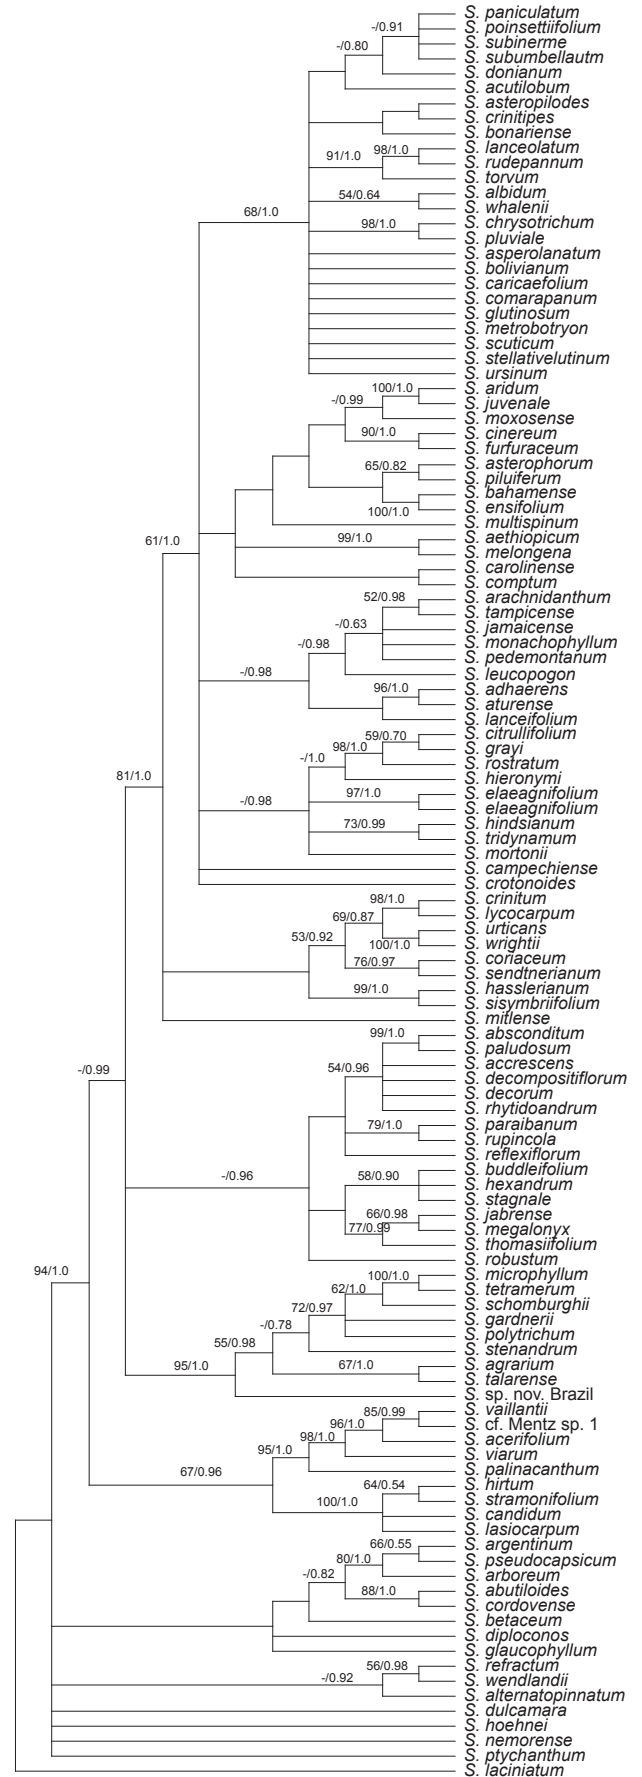

**Fig. S3.** Strict consensus of 209 most parsimonious trees obtained from the ITS data. Numbers above branches are bootstrap values over 50% followed by posterior probabilities from Bayesian analysis.
